# Supplementary material for: Lead calix[n]arenes (n = 4, 6, 8): structures and ring opening homo-/co-polymerization capability for cyclic esters
Source: Royal Society of Chemistry journal article supplement (doi:10.1039/d1dt02790e), 2021-01-01
Supplement: d1dt02790e1.pdf [file d1dt02790e1.pdf]

## Electronic Supplementary Information

### Lead calix[n]arenes (n=4, 6, 8): Structures and ring opening homo-/co-polymerization capability for cyclic esters.

Tian Xing,<sup>a</sup> Timothy J. Prior,<sup>a</sup> and Carl Redshaw<sup>a\*</sup>

<sup>a</sup> *Plastics Collaboratory, Department of Chemistry, University of Hull, Cottingham Road, Hull, HU6 7RX, UK.*

#### Crystallography

**Figure S1.** Two Pb-aryl interactions present result in the formation of the observed dimers for  $[\text{Pb}_{12}(\text{L}^8)_2\text{O}_4] \cdot 8 \cdot 7\text{C}_7\text{H}_8$  ( $4 \cdot 8 \cdot 7\text{C}_7\text{H}_8$ ). The two Pb-aryl interactions shown are equivalent by symmetry. The Pb-centroid distance is 3.3608(1) Å.

**Table S1.** Crystal structure data for  $1 \cdot 2.5\text{MeCN}$ ,  $2 \cdot 14\text{MeCN}$ ,  $3 \cdot 11\text{MeCN}$ ,  $4 \cdot 8 \cdot 7\text{C}_7\text{H}_8$ ,  $5$ ,  $6 \cdot 9.5\text{MeCN}$ ,  $7 \cdot 12\text{MeCN}$ .

#### ROP studies

**Figure S2.** Mass spectrum of PCL synthesized with  $4/\text{BnOH}$  (run 19, Table 1).

**Figure S3.**  $^1\text{H}$  NMR spectrum ( $\text{CDCl}_3$ , 400 MHz, 298 K) of the PCL synthesized with  $2/\text{BnOH}$  (run 17, Table 1).

**Figure S4.** Mass spectrum of PVL synthesized with  $2/\text{BnOH}$  (run 8, Table 2).

**Figure S5.**  $^1\text{H}$  NMR spectrum ( $\text{CDCl}_3$ , 400 MHz, 298 K) of the PVL synthesized with  $3/\text{BnOH}$  (run 9, Table 2).

**Figure S6.**  $^1\text{H}$  NMR spectrum ( $\text{CDCl}_3$ , 400 MHz, 298 K) of the PCL-PVL co-polymer synthesized with  $3/\text{BnOH}$  (run 3, Table 3).

**Figure S7.** Carbonyl range of  $^{13}\text{C}$  NMR spectrum ( $\text{CDCl}_3$ , 25 °C) of PCL-PVL co-polymer synthesized with  $3/\text{BnOH}$  (run 3, Table 3).

**Figure S8.**  $^1\text{H}$  NMR spectrum ( $\text{CDCl}_3$ , 400 MHz, 298 K) of the PLA synthesized with **1**/BnOH (run 1, Table 4).

**Figure S9.** Mass spectrum of PLA synthesized with **2**/BnOH (run 2, Table 4).

**Figure S10.** 2D J-resolved  $^1\text{H}$  NMR spectrum ( $\text{CDCl}_3$ , 400 MHz, 298 K) of the PLA synthesized with **1**/BnOH (run 1, Table 4).

**Equation S1.** Determination of number-average sequence length for CL

**Equation S2.** Determination of number-average sequence length for VL.

**Equation S3.** Determination of the Randomness Character (R).

## Crystallography

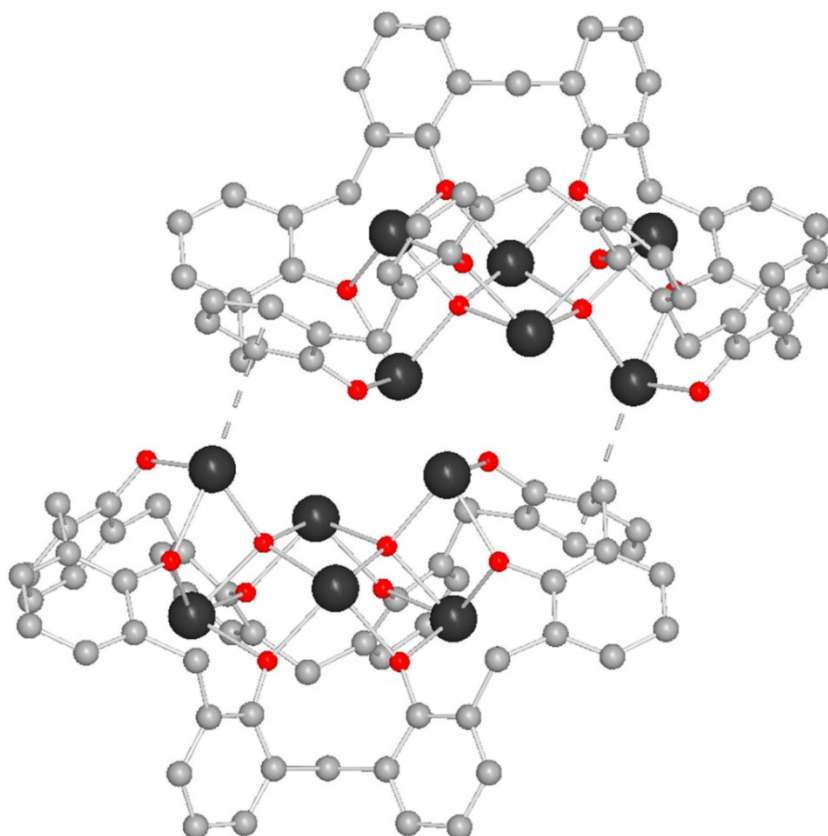

**Figure S1.** Two Pb-aryl interactions present result in the formation of the observed dimers for  $[\text{Pb}_{12}(\text{L}^8)_2\text{O}_4] \cdot 8.7\text{C}_7\text{H}_8$  (**4**·8.7C<sub>7</sub>H<sub>8</sub>). The two Pb-aryl interactions shown are equivalent by symmetry. The Pb-centroid distance is 3.3608(1) Å.

**Table S1.** Crystal structure data for **1**·2.5MeCN, **2**·14MeCN, **3**·11MeCN, **4**·8.7C<sub>7</sub>H<sub>8</sub>, **5**, **6**·9.5MeCN, **7**·12MeCN.

| Compound                                                                     | <b>1</b> ·4.5MeCN                                                                                    | <b>2</b> ·14MeCN                                                                                                   | <b>3</b> ·11MeCN                                                                   | <b>4</b> ·8.7C <sub>7</sub> H <sub>8</sub>                             |
|------------------------------------------------------------------------------|------------------------------------------------------------------------------------------------------|--------------------------------------------------------------------------------------------------------------------|------------------------------------------------------------------------------------|------------------------------------------------------------------------|
| Formula                                                                      | C <sub>191</sub> H <sub>236.5</sub> Li <sub>2</sub> N <sub>7.5</sub> O <sub>17</sub> Pb <sub>4</sub> | C <sub>300</sub> H <sub>371</sub> Cl <sub>2</sub> Li <sub>10</sub> N <sub>18</sub> O <sub>30</sub> Pb <sub>8</sub> | C <sub>229</sub> H <sub>286</sub> N <sub>11</sub> O <sub>29</sub> Pb <sub>13</sub> | C <sub>236.9</sub> H <sub>277.6</sub> O <sub>20</sub> Pb <sub>12</sub> |
| Formula weight                                                               | 3753.16                                                                                              | 6509.72                                                                                                            | 6357.82                                                                            | 5931.25                                                                |
| Crystal system                                                               | Triclinic                                                                                            | Triclinic                                                                                                          | Triclinic                                                                          | Triclinic                                                              |
| Space group                                                                  | <i>P</i> -1                                                                                          | <i>P</i> -1                                                                                                        | <i>P</i> -1                                                                        | <i>P</i> -1                                                            |
| Unit cell                                                                    |                                                                                                      |                                                                                                                    |                                                                                    |                                                                        |
| <i>a</i> (Å)                                                                 | 13.7079(3)                                                                                           | 23.1594(4)                                                                                                         | 19.2866(2)                                                                         | 17.5373(3)                                                             |
| <i>b</i> (Å)                                                                 | 15.0694(2)                                                                                           | 25.7268(4)                                                                                                         | 23.0573(3)                                                                         | 17.9311(4)                                                             |
| <i>c</i> (Å)                                                                 | 22.7536(4)                                                                                           | 28.7875(6)                                                                                                         | 29.8976(4)                                                                         | 21.0467(4)                                                             |
| $\alpha$ (°)                                                                 | 97.3001(15)                                                                                          | 69.691(2)                                                                                                          | 72.2187(11)                                                                        | 67.965(2)                                                              |
| $\beta$ (°)                                                                  | 100.2859(17)                                                                                         | 72.882(2)                                                                                                          | 82.1388(10)                                                                        | 86.0380(10)                                                            |
| $\gamma$ (°)                                                                 | 102.8843(16)                                                                                         | 85.7680(10)                                                                                                        | 67.9805(11)                                                                        | 64.379(2)                                                              |
| <i>V</i> (Å <sup>3</sup> )                                                   | 4439.47(14)                                                                                          | 15365.5(5)                                                                                                         | 11733.0(2)                                                                         | 5497.3(2)                                                              |
| <i>Z</i>                                                                     | 1                                                                                                    | 2                                                                                                                  | 2                                                                                  | 1                                                                      |
| Temperature (K)                                                              | 100(10)                                                                                              | 100(2)                                                                                                             | 100(2)                                                                             | 100(2)                                                                 |
| Wavelength (Å)                                                               | 0.71075                                                                                              | 0.71075                                                                                                            | 0.71075                                                                            | 0.71075                                                                |
| Calculated                                                                   | 1.365                                                                                                | 1.326                                                                                                              | 1.710                                                                              | 1.792                                                                  |
| Absorption                                                                   | 7.706                                                                                                | 4.441                                                                                                              | 9.349                                                                              | 9.211                                                                  |
| Transmission                                                                 | 0.828 and 1.000                                                                                      | 0.682 and 1.000                                                                                                    | 0.587 and 0.595                                                                    | 0.809 and 1.000                                                        |
| Crystal size                                                                 | 0.04 × 0.04 × 0.01                                                                                   | 0.25 × 0.18 × 0.1                                                                                                  | 0.104 × 0.061 × 0.053                                                              | 0.04 × 0.01 × 0.01                                                     |
| $\theta$ (max) (°)                                                           | 70.4                                                                                                 | 26.3                                                                                                               | 28.3                                                                               | 27.6                                                                   |
| Reflections                                                                  | 74814                                                                                                | 327875                                                                                                             | 256697                                                                             | 194208                                                                 |
| Unique                                                                       | 16536                                                                                                | 62724                                                                                                              | 57728                                                                              | 25401                                                                  |
| <i>R</i> <sub>int</sub>                                                      | 0.0948                                                                                               | 0.0644                                                                                                             | 0.0962                                                                             | 0.0809                                                                 |
| Reflections with                                                             | 14151                                                                                                | 41423                                                                                                              | 37456                                                                              | 21078                                                                  |
| Number of                                                                    | 961                                                                                                  | 3093                                                                                                               | 2358                                                                               | 1159                                                                   |
| <i>R</i> <sub>1</sub> [ <i>F</i> <sup>2</sup> > 2σ( <i>F</i> <sup>2</sup> )] | 0.0795                                                                                               | 0.0679                                                                                                             | 0.0756                                                                             | 0.044                                                                  |
| <i>wR</i> <sub>2</sub> (all data)                                            | 0.1279                                                                                               | 0.2025                                                                                                             | 0.1628                                                                             | 0.114                                                                  |
| GOOF, <i>S</i>                                                               | 1.228                                                                                                | 1.014                                                                                                              | 1.027                                                                              | 1.02                                                                   |
| Largest                                                                      | 1.90 and -2.42                                                                                       | 3.92 and -1.58                                                                                                     | 5.05 and -1.88                                                                     | 3.57 and -2.30                                                         |
| Compound                                                                     | <b>5</b>                                                                                             | <b>6</b> ·9.5MeCN                                                                                                  | <b>7</b> ·12MeCN                                                                   |                                                                        |
| Formula                                                                      | C <sub>94</sub> H <sub>122</sub> Cl <sub>2</sub> O <sub>10</sub> Pb <sub>6</sub> Si <sub>2</sub>     | C <sub>151</sub> H <sub>185.5</sub> N <sub>9.5</sub> ClLi <sub>2</sub> O <sub>17</sub> Pb <sub>10</sub>            | C <sub>200</sub> H <sub>242</sub> N <sub>12</sub> O <sub>20</sub> Pb <sub>12</sub> |                                                                        |
| Formula weight                                                               | 2782.13                                                                                              | 4607.40                                                                                                            | 5620.32                                                                            |                                                                        |
| Crystal system                                                               | Triclinic                                                                                            | Monoclinic                                                                                                         | Triclinic                                                                          |                                                                        |
| Space group                                                                  | <i>P</i> -1                                                                                          | <i>I</i> 2/ <i>a</i>                                                                                               | <i>P</i> -1                                                                        |                                                                        |
| Unit cell                                                                    |                                                                                                      |                                                                                                                    |                                                                                    |                                                                        |
| <i>a</i> (Å)                                                                 | 14.3597(5)                                                                                           | 19.7928(2)                                                                                                         | 18.0913(3)                                                                         |                                                                        |
| <i>b</i> (Å)                                                                 | 15.8609(8)                                                                                           | 33.7801(3)                                                                                                         | 18.1443(3)                                                                         |                                                                        |
| <i>c</i> (Å)                                                                 | 15.8791(6)                                                                                           | 24.5621(3)                                                                                                         | 19.6341(3)                                                                         |                                                                        |

|                                |                       |                    |                    |
|--------------------------------|-----------------------|--------------------|--------------------|
| $\alpha$ (°)                   | 66.795(5)             | 90                 | 66.654(2)          |
| $\beta$ (°)                    | 67.082(4)             | 105.5489(10)       | 73.896(2)          |
| $\gamma$ (°)                   | 88.389(3)             | 90                 | 89.9500(10)        |
| $V$ (Å <sup>3</sup> )          | 3027.9(2)             | 15821.3(3)         | 5641.51(18)        |
| $Z$                            | 1                     | 8                  | 1                  |
| Temperature (K)                | 100(2)                | 100(2)             | 100.15             |
| Wavelength (Å)                 | 0.71075               | 0.71075            | 0.71075            |
| Calculated                     | 1.526                 | 1.771              | 1.654              |
| Absorption                     | 8.376                 | 10.668             | 8.972              |
| Transmission                   | 0.628 and 1.000       | 0.733 and 1.000    | 0.720 and 1.000    |
| Crystal size                   | 0.090 × 0.060 × 0.025 | 0.09 × 0.08 × 0.07 | 0.12 × 0.08 × 0.06 |
| $\theta$ (max) (°)             | 25.0                  | 31.97              | 25.7               |
| Reflections                    | 57186                 | 211141             | 107191             |
| Unique                         | 10657                 | 24791              | 21322              |
| $R_{\text{int}}$               | 0.0600                | 0.0591             | 0.0701             |
| Reflections with               | 6953                  | 18155              | 17119              |
| Number of                      | 582                   | 774                | 1101               |
| $R_1$ [ $F^2 > 2\sigma(F^2)$ ] | 0.0816                | 0.0389             | 0.0571             |
| $wR_2$ (all data)              | 0.2366                | 0.0897             | 0.1623             |
| GOOF, $S$                      | 1.035                 | 1.059              | 1.042              |
| Largest                        | 4.36 and -2.20        | 2.79 and -1.34     | 5.46 and -3.10     |

## ROP studies

### National Mass Spectrometry Facility (NMSF), Swansea

D:\Data\NMSF\2021\Feb21\HULRED-FKAAW-UM-B\0\_M8\1\1SRef

Comment 1 Prof. Redshaw Pb[8]-CL MW=4.5k(poly)?? PosRef THF [1:10] (DCTB;THF) +NaOAc

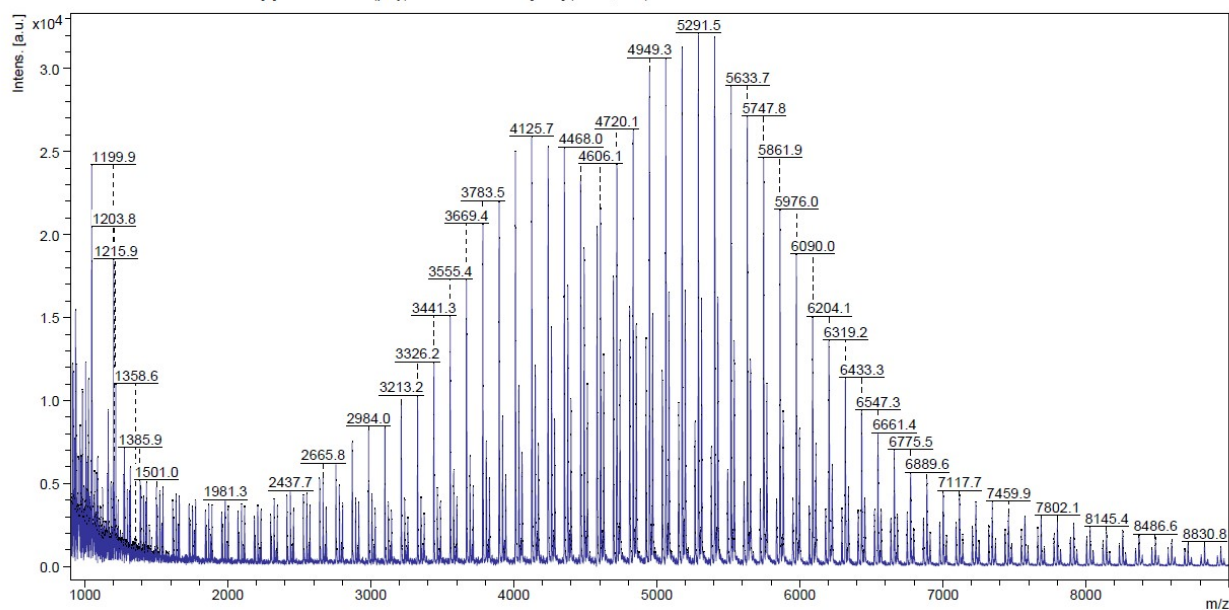

ultrafleXtreme MALDI

Date of Acquisition 2021-02-12T14:13:21.290+00:00

Printed 17/02/2021 09:45:22

National Mass Spectrometry Facility (NMSF), Swansea

D:\Data\NMSF\2021\Feb21\HULRED-FKAAW-UM-A\0\_M8\1\1SLin

Comment 1 Prof. Redshaw Pb[8]-CL MW=4.5k(poly)?? PosLin THF [1:10] (DCTB;THF) +NaOAc

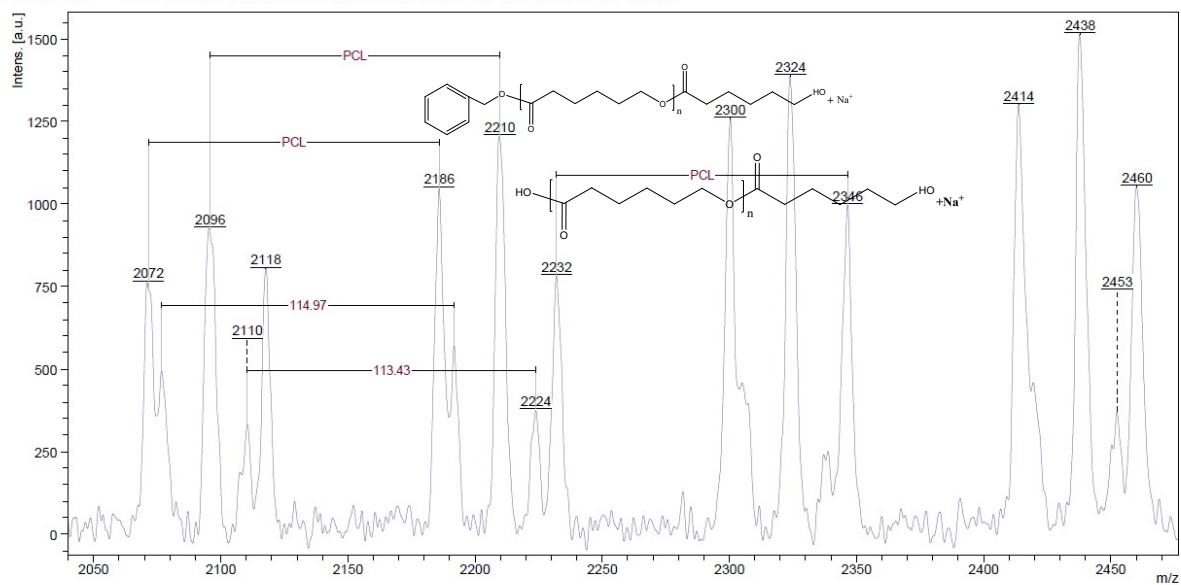

ultrafleXtreme MALDI

Date of Acquisition 2021-02-12T13:47:49.814+00:00

Printed 17/02/2021 09:21:39

National Mass Spectrometry Facility (NMSF), Swansea

D:\Data\NMSF\2021\Feb21\HULRED-FKAAW-UM-A\0\_M8\1\1SLin

Comment 1 Prof. Redshaw Pb[8]-CL MW=4.5k(poly)?? PosLin THF [1:10] (DCTB;THF) +NaOAc

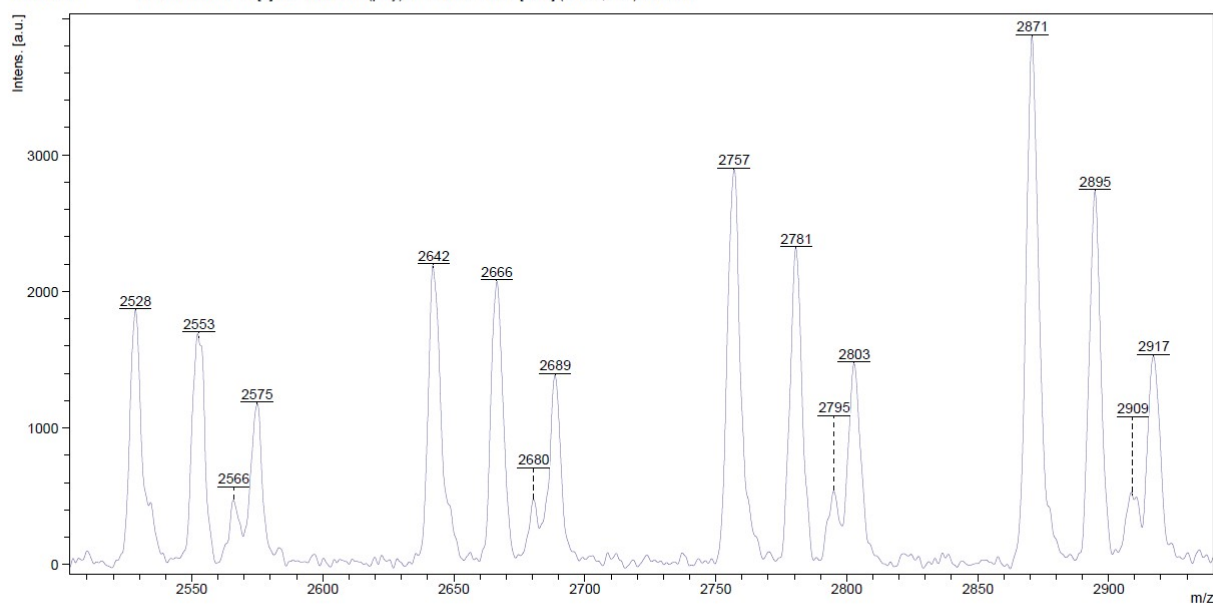

ultrafleXtreme MALDI

Date of Acquisition 2021-02-12T13:47:49.814+00:00

Printed 17/02/2021 09:21:51

National Mass Spectrometry Facility (NMSF), Swansea

D:\Data\NMSF\2021\Feb21\HULRED-FKAAW-UM-A\0\_M8\1\1SLin  
Comment 1 Prof. Redshaw Pb[8]-CL MW=4.5k(poly)?? PosLin THF [1:10] (DCTB;THF) +NaOAc

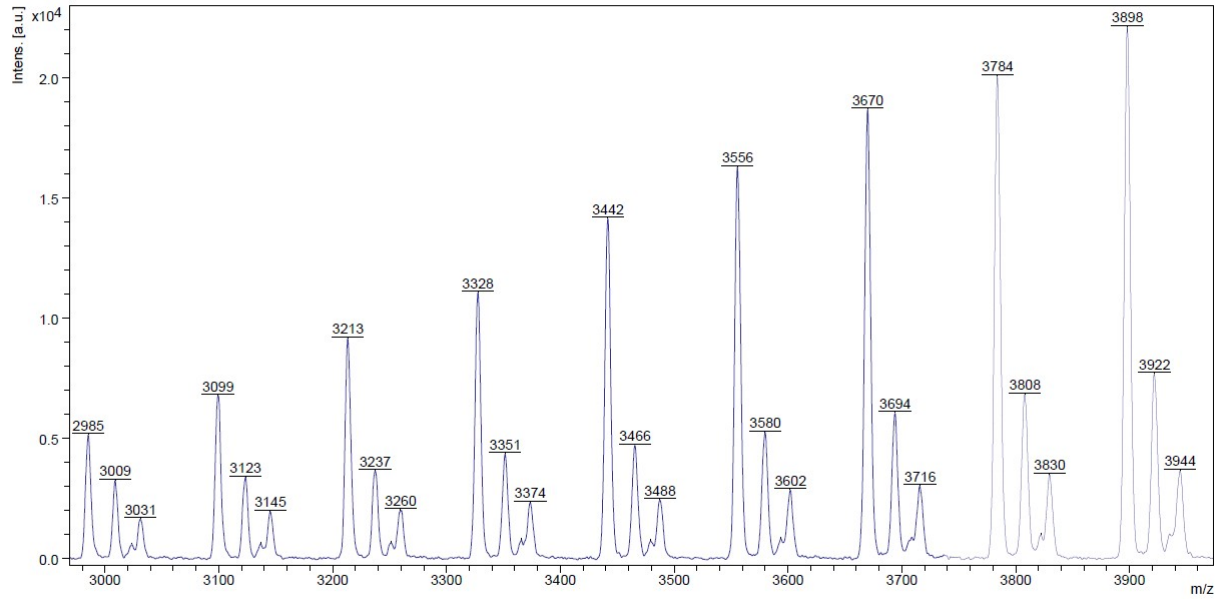

ultrafleXtreme MALDI Date of Acquisition 2021-02-12T13:47:49.814+00:00 Printed 17/02/2021 09:22:08

National Mass Spectrometry Facility (NMSF), Swansea

D:\Data\NMSF\2021\Feb21\HULRED-FKAAW-UM-A\0\_M8\1\1SLin  
Comment 1 Prof. Redshaw Pb[8]-CL MW=4.5k(poly)?? PosLin THF [1:10] (DCTB;THF) +NaOAc

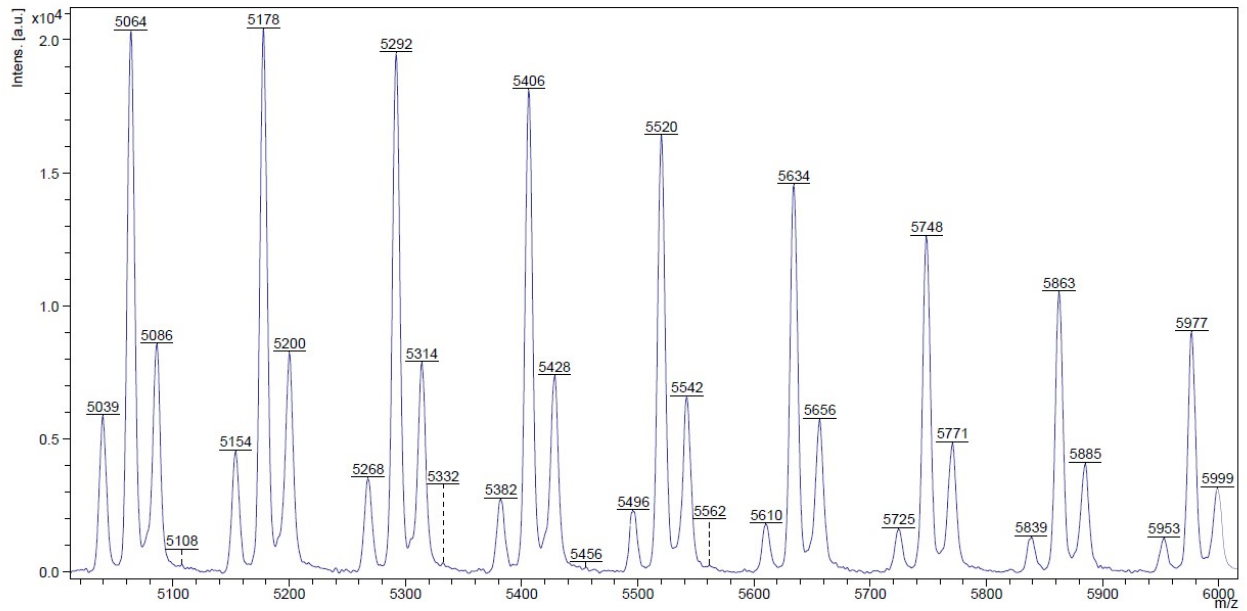

ultrafleXtreme MALDI Date of Acquisition 2021-02-12T13:47:49.814+00:00 Printed 17/02/2021 09:22:34

National Mass Spectrometry Facility (NMSF), Swansea

D:\Data\NMSF\2021\Feb21\HULRED-FKAAW-UM-B\0\_M8\1\1SRef

Comment 1 Prof. Redshaw Pb[8]-CL MW=4.5k(poly)?? PosRef THF [1:10] (DCTB;THF) +NaOAc

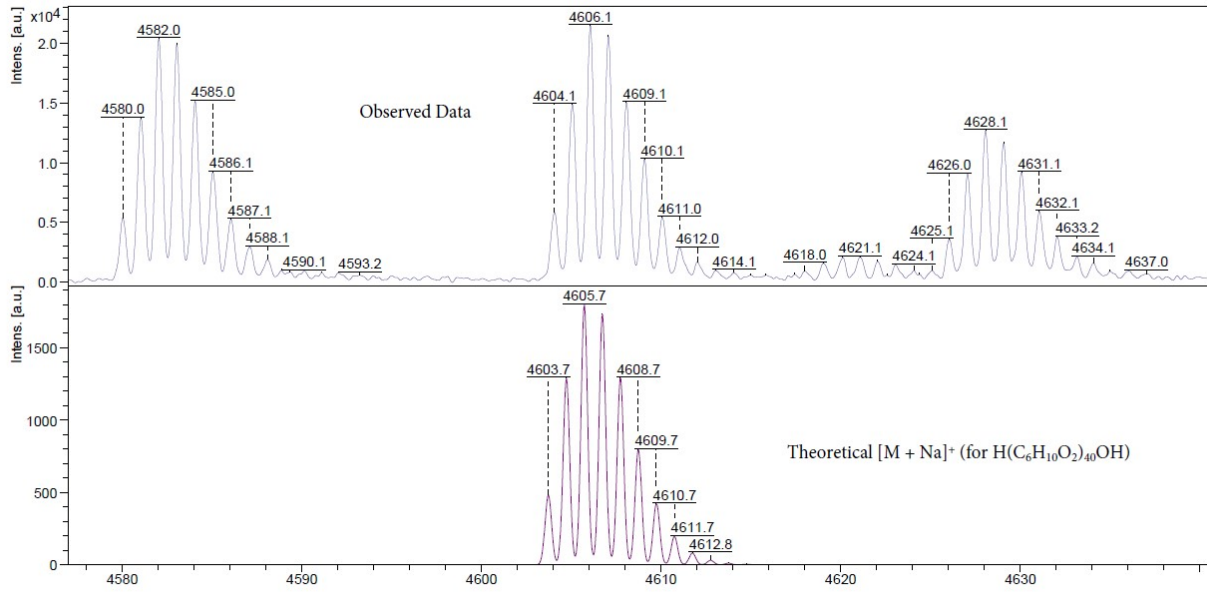

ultrafleXtreme MALDI

Date of Acquisition 2021-02-12T14:13:21.290+00:00

Printed 17/02/2021 09:54:32

National Mass Spectrometry Facility (NMSF), Swansea

D:\Data\NMSF\2021\Feb21\HULRED-FKAAW-UM-B\0\_M8\1\1SRef

Comment 1 Prof. Redshaw Pb[8]-CL MW=4.5k(poly)?? PosRef THF [1:10] (DCTB;THF) +NaOAc

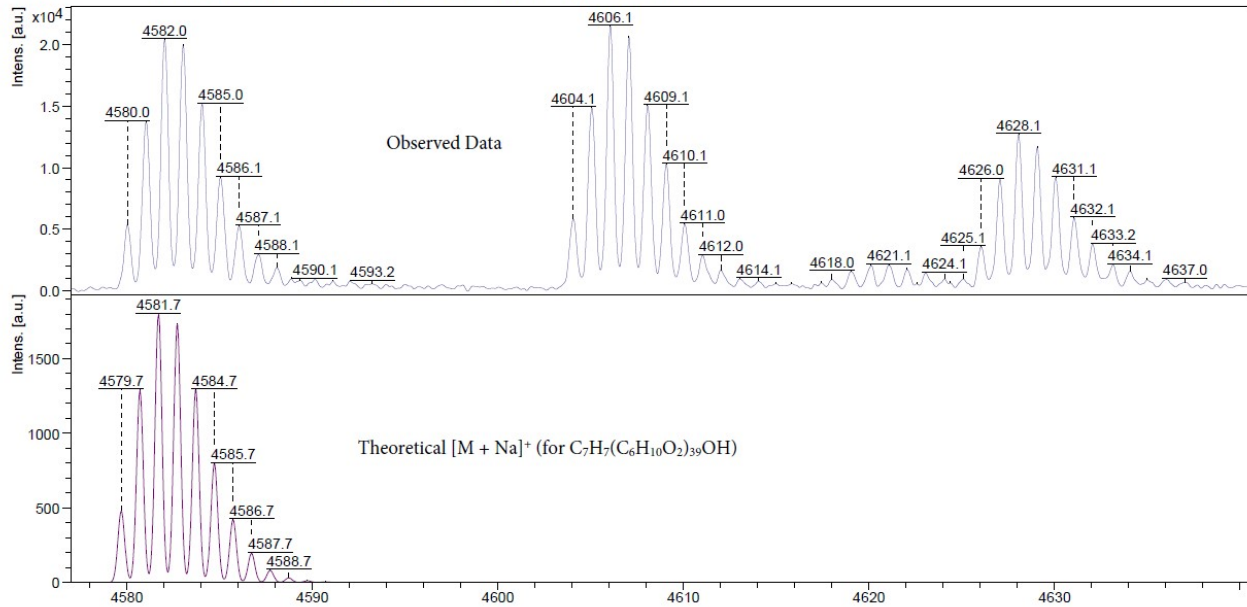

ultrafleXtreme MALDI

Date of Acquisition 2021-02-12T14:13:21.290+00:00

Printed 17/02/2021 09:56:44

Figure S2. Mass spectrum of PCL synthesized with 4/BnOH (run 19, Table 1).

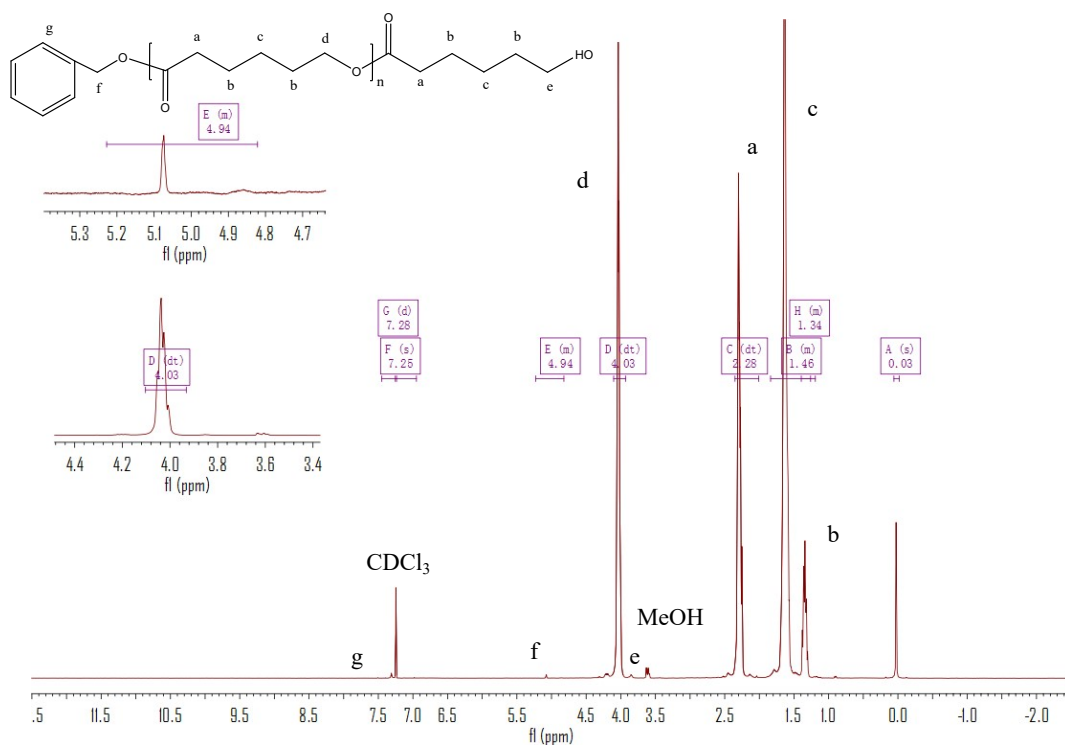

**Figure S3.** <sup>1</sup>H NMR spectrum (CDCl<sub>3</sub>, 400 MHz, 298 K) of the PCL synthesized with 2/BnOH (run 17, Table 1)

National Mass Spectrometry Facility (NMSF), Swansea

D:\Data\NMSF\2021\Feb21\HULRED-FKAXL-UM-A\0\_N7\1\1SLin

Comment 1 Prof. Redshaw Pb[6]-VL MW=2.5k(poly)?? PosLin THF [1:10] (DCTB:THF) +NaOAc

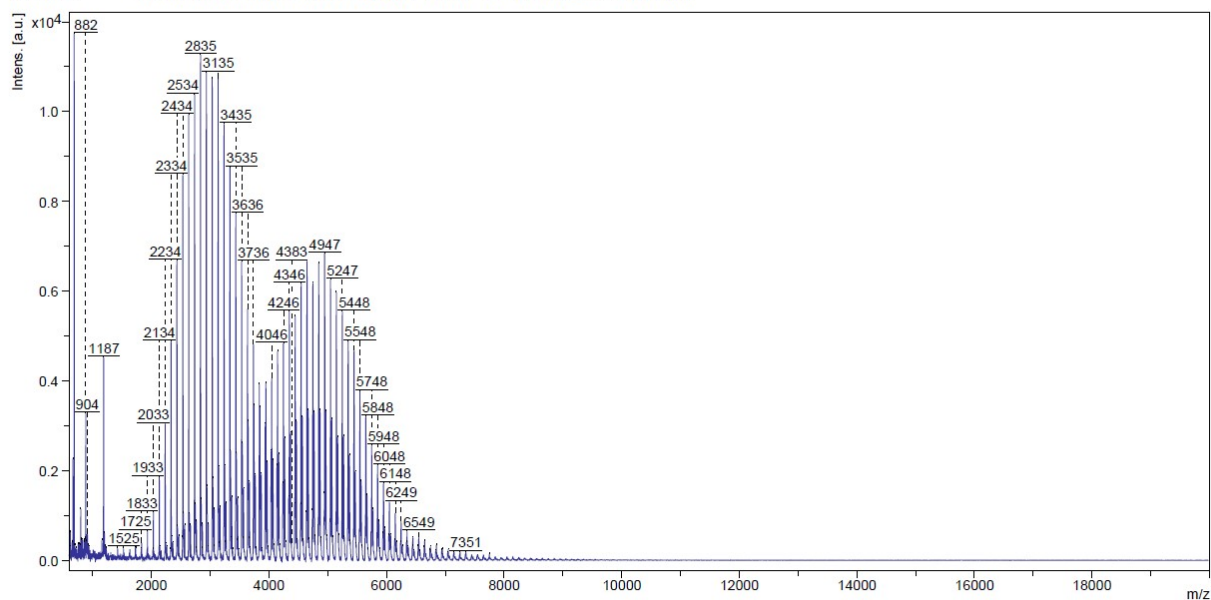

ultrafleXtreme MALDI

Date of Acquisition 2021-02-12T13:52:12.832+00:00

Printed 17/02/2021 11:02:55



National Mass Spectrometry Facility (NMSF), Swansea

D:\Data\NMSF\2021\Feb21\HULRED-FKAXL-UM-A\0\_N7\1\1\SLin

Comment 1 Prof. Redshaw Pb[6]-VL MW=2.5k(poly)?? PosLin THF [1:10] (DCTB:THF) +NaOAc

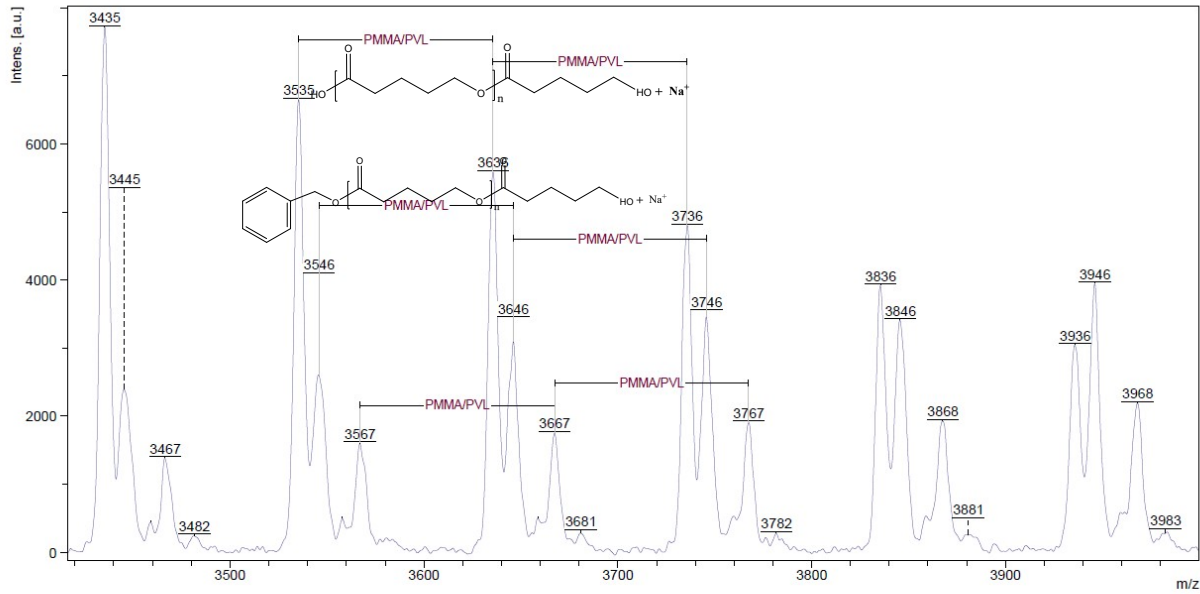

ultrafleXtreme MALDI

Date of Acquisition 2021-02-12T13:52:12.832+00:00

Printed 17/02/2021 11:05:35

National Mass Spectrometry Facility (NMSF), Swansea

D:\Data\NMSF\2021\Feb21\HULRED-FKAXL-UM-A\0\_N7\1\1\SLin

Comment 1 Prof. Redshaw Pb[6]-VL MW=2.5k(poly)?? PosLin THF [1:10] (DCTB:THF) +NaOAc

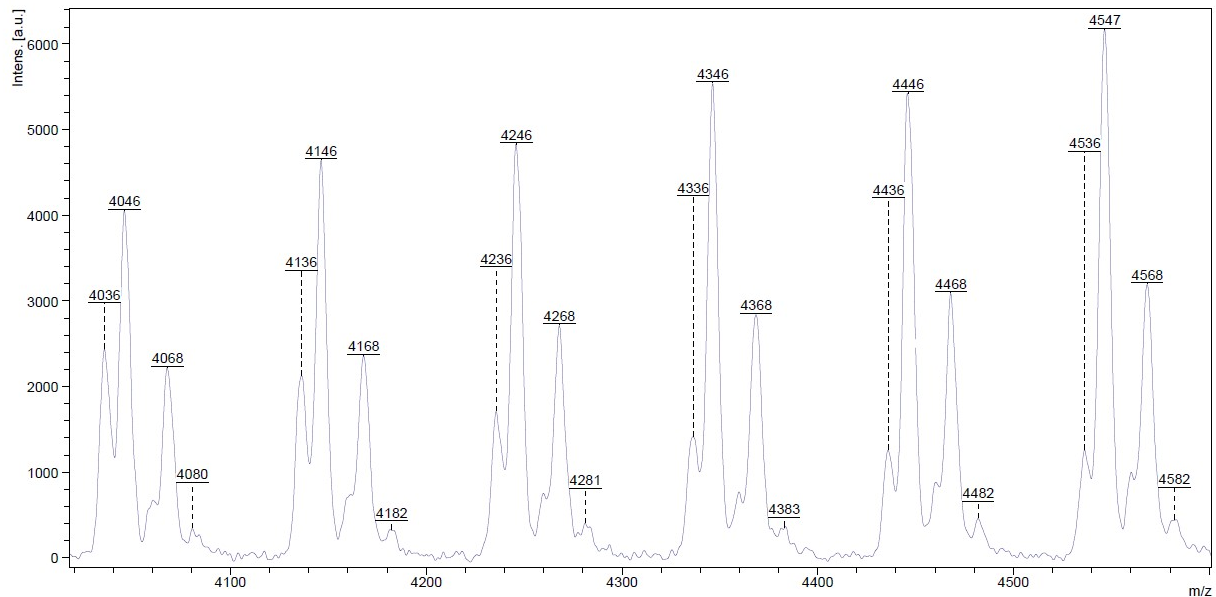

ultrafleXtreme MALDI

Date of Acquisition 2021-02-12T13:52:12.832+00:00

Printed 17/02/2021 11:05:59

National Mass Spectrometry Facility (NMSF), Swansea

D:\Data\NMSF\2021\Feb21\HULRED-FKAXL-UM-B\0\_N7\1\1SRRef

Comment 1 Prof. Redshaw Pb[6]-VL MW=2.5k(poly)?? PosRef THF [1:10] (DCTB;THF) +NaOAc

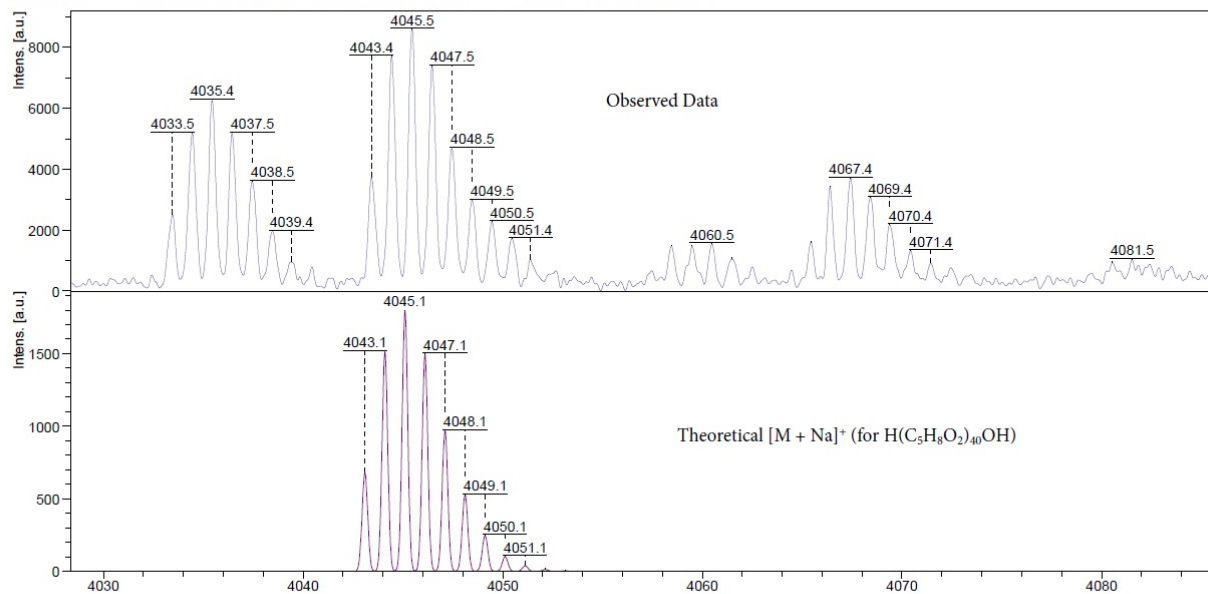

ultrafleXtreme MALDI

Date of Acquisition 2021-02-12T14:23:51.706+00:00

Printed 17/02/2021 12:22:58

National Mass Spectrometry Facility (NMSF), Swansea

D:\Data\NMSF\2021\Feb21\HULRED-FKAXL-UM-B\0\_N7\1\1SRRef

Comment 1 Prof. Redshaw Pb[6]-VL MW=2.5k(poly)?? PosRef THF [1:10] (DCTB;THF) +NaOAc

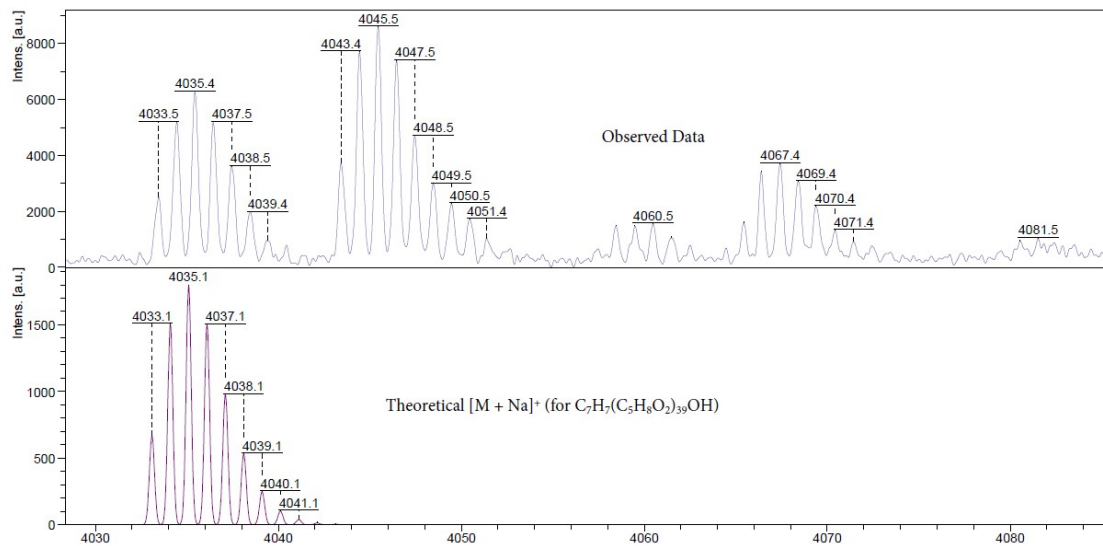

ultrafleXtreme MALDI

Date of Acquisition 2021-02-12T14:23:51.706+00:00

Printed 17/02/2021 12:26:37

Figure S4. Mass spectrum of PVL synthesized with 2/BnOH (run 8, Table 2).

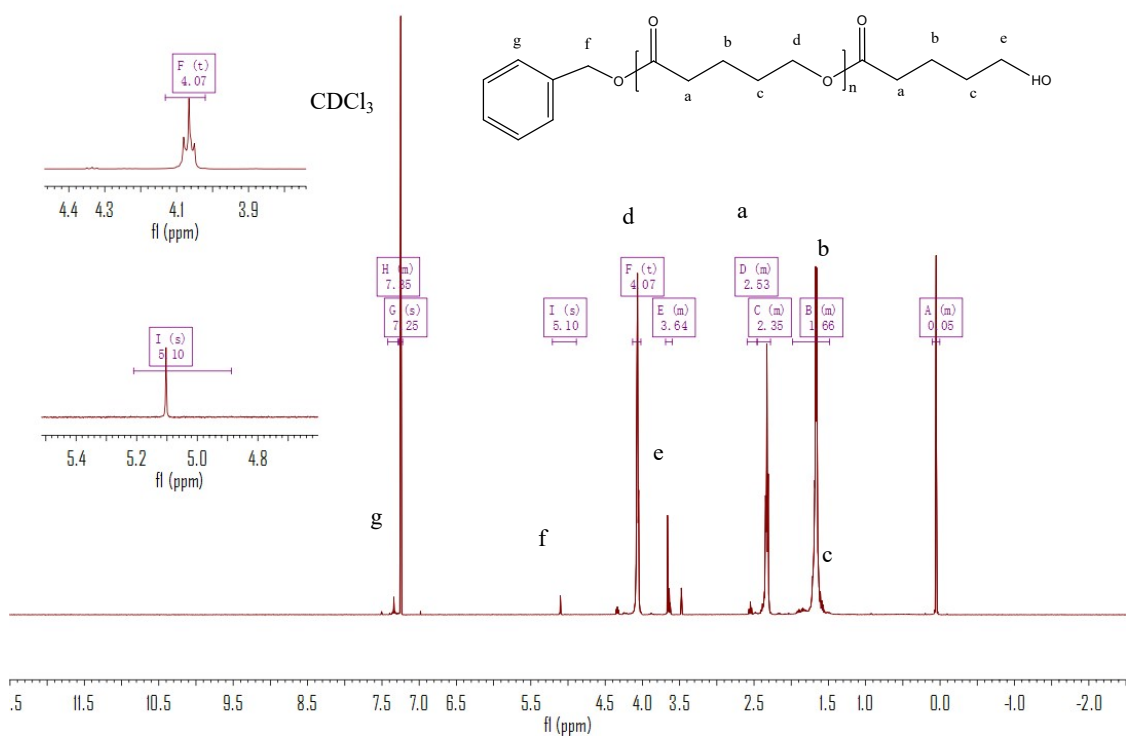

**Figure S5.** <sup>1</sup>H NMR spectrum (CDCl<sub>3</sub>, 400 MHz, 298 K) of the PVL synthesized with 3/BnOH (run 9, Table 2).

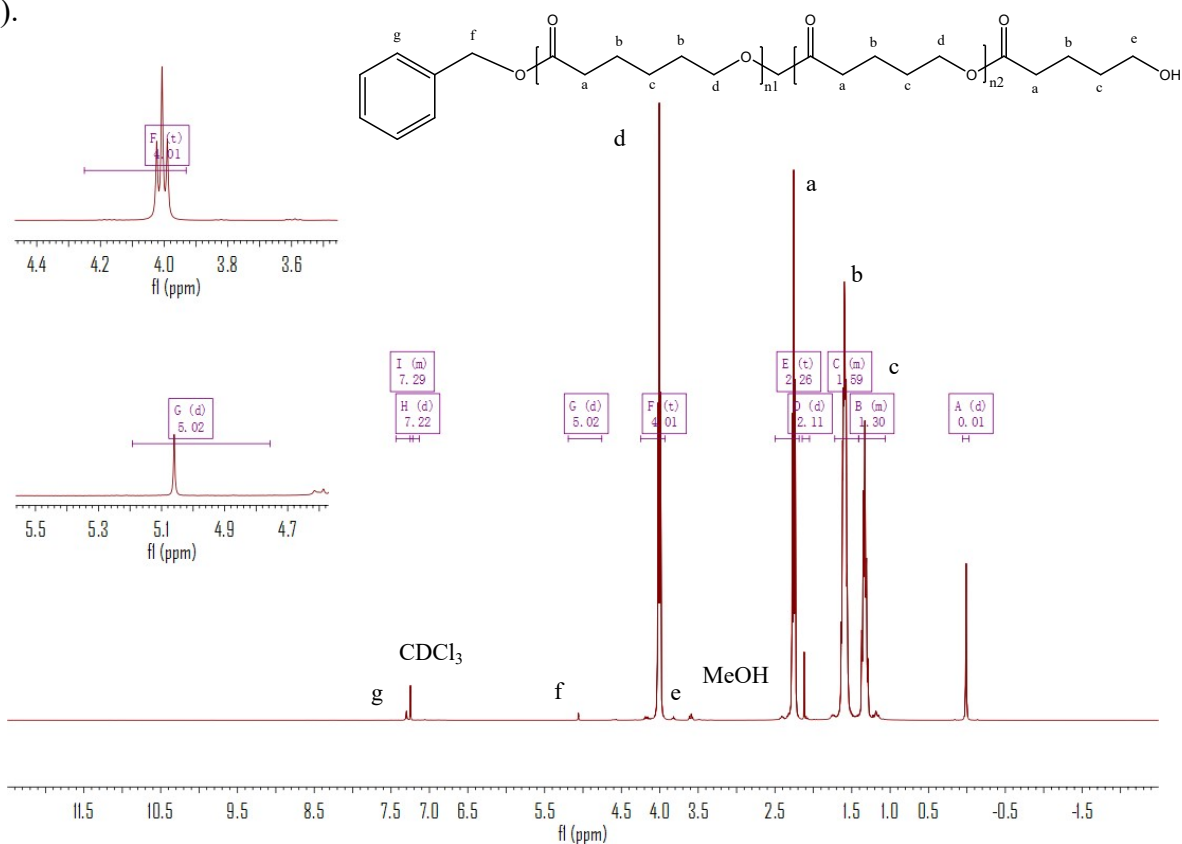

**Figure S6.** <sup>1</sup>H NMR spectrum (CDCl<sub>3</sub>, 400 MHz, 298 K) of the PCL-PVL co-polymer synthesized with

3/BnOH (run 3, Table 3).

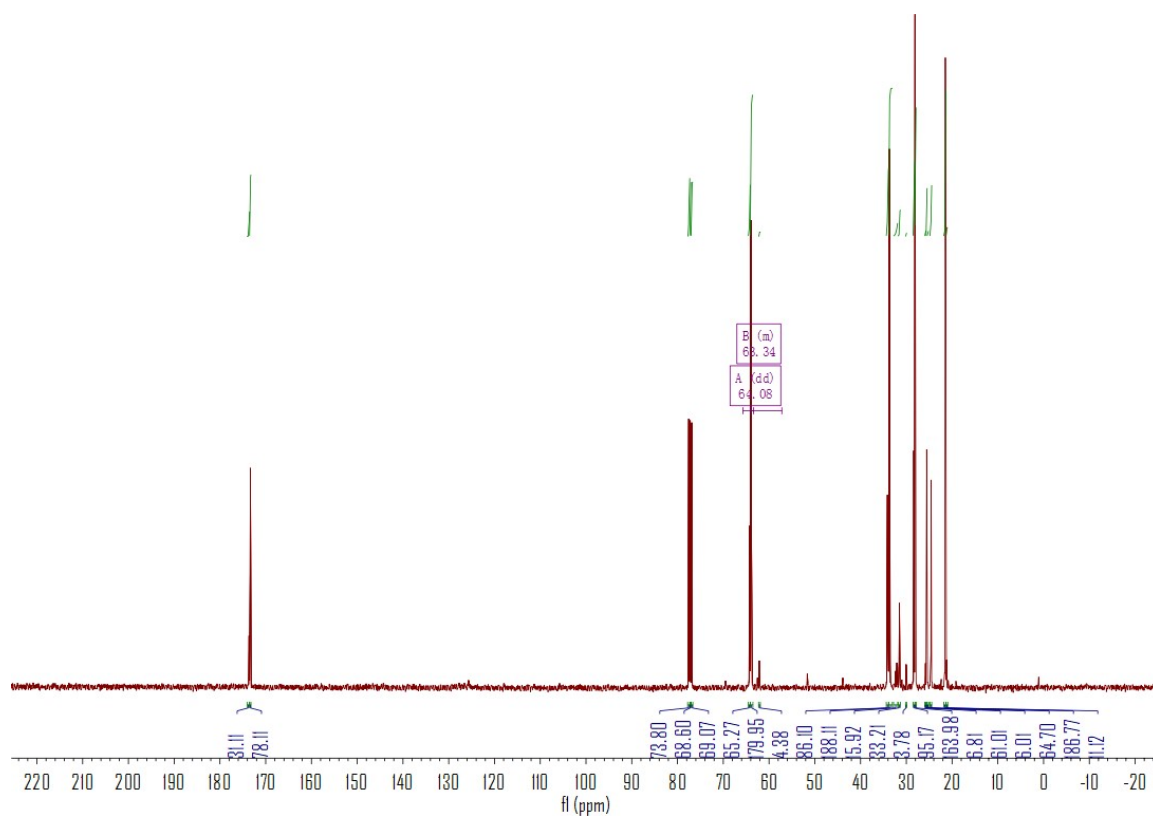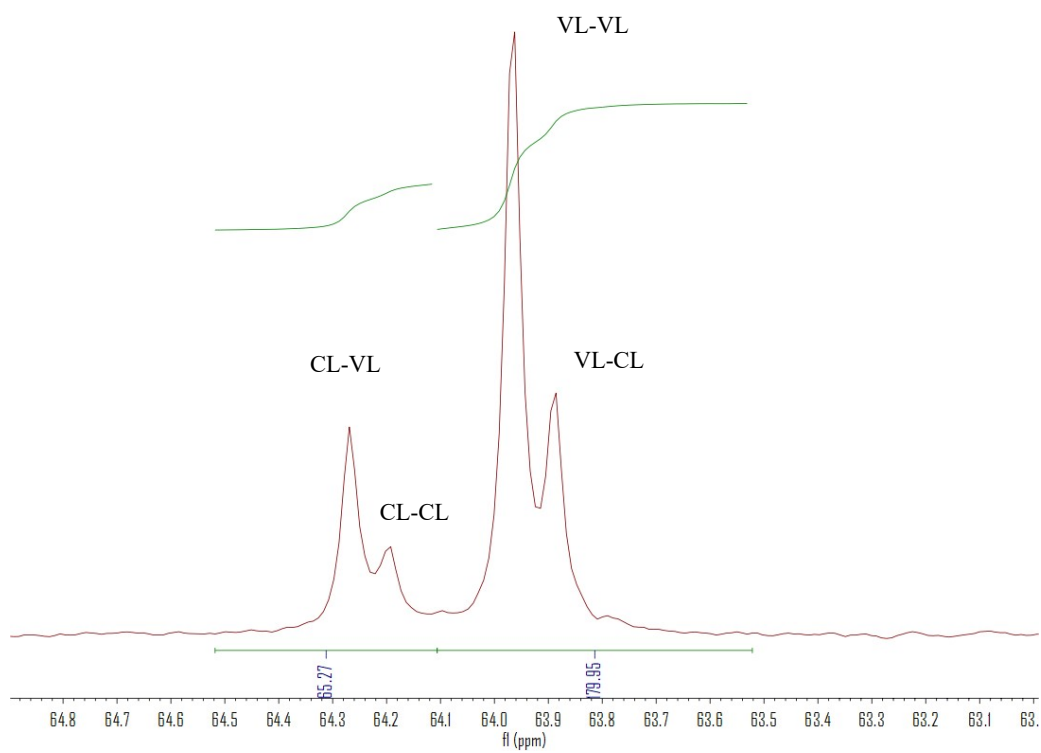

**Figure S7.** Carbonyl range of  $^{13}\text{C}$  NMR spectrum ( $\text{CDCl}_3$ , 25 °C) of PCL-PVL co-polymer synthesized with 3/BnOH (run 3, Table 3).

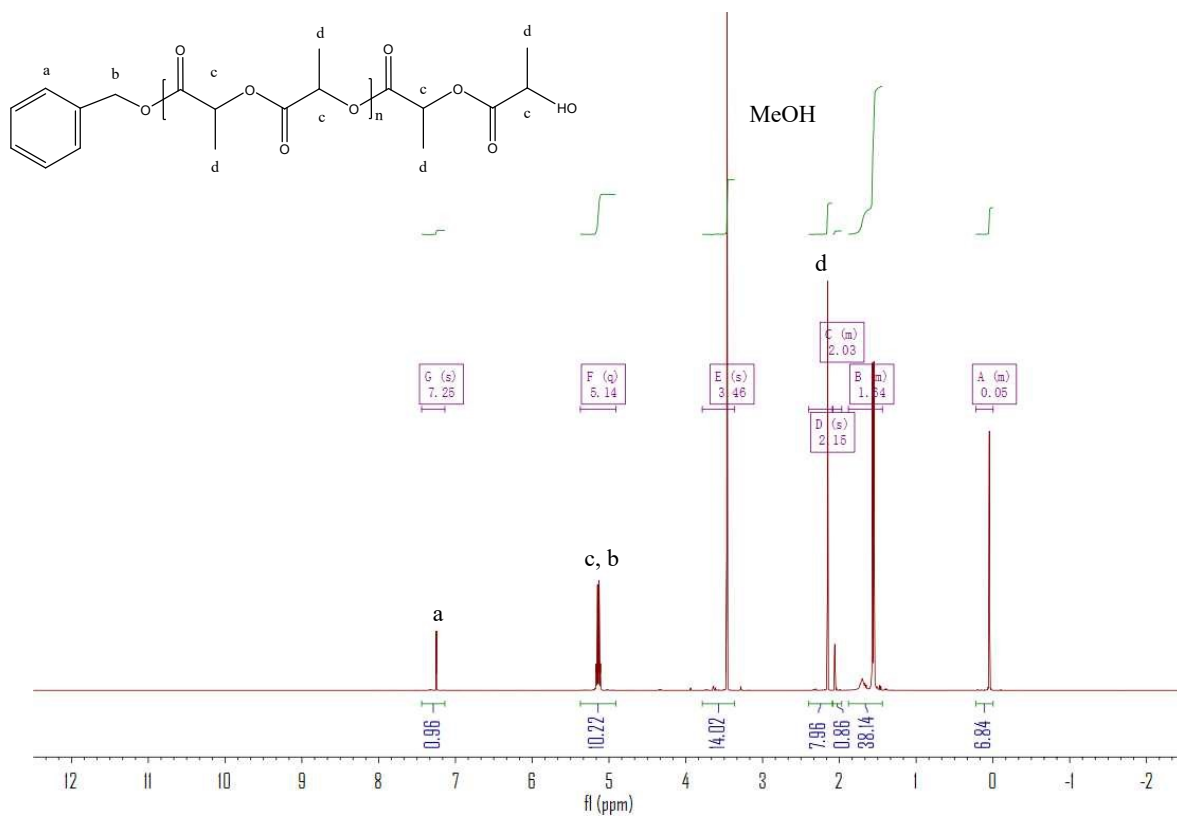

**Figure S8.**  $^1\text{H}$  NMR spectrum ( $\text{CDCl}_3$ , 400 MHz, 298 K) of the PLA synthesized with 1/BnOH (run 1, Table 4).

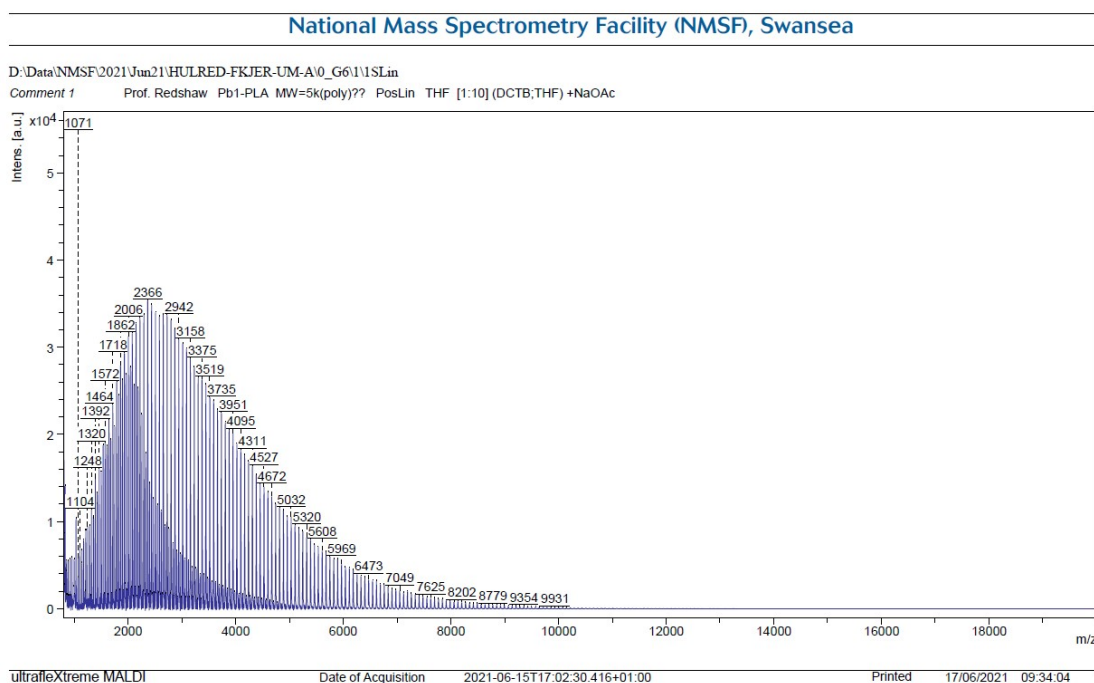

National Mass Spectrometry Facility (NMSF), Swansea

D:\Data\NMSF\2021\Jun21\HULRED-FKJER-UM-A\0\_G6\1\1SLin

Comment 1 Prof. Redshaw Pb1-PLA MW=5k(poly)?? PosLin THF [1:10] (DCTB;THF) +NaOAc

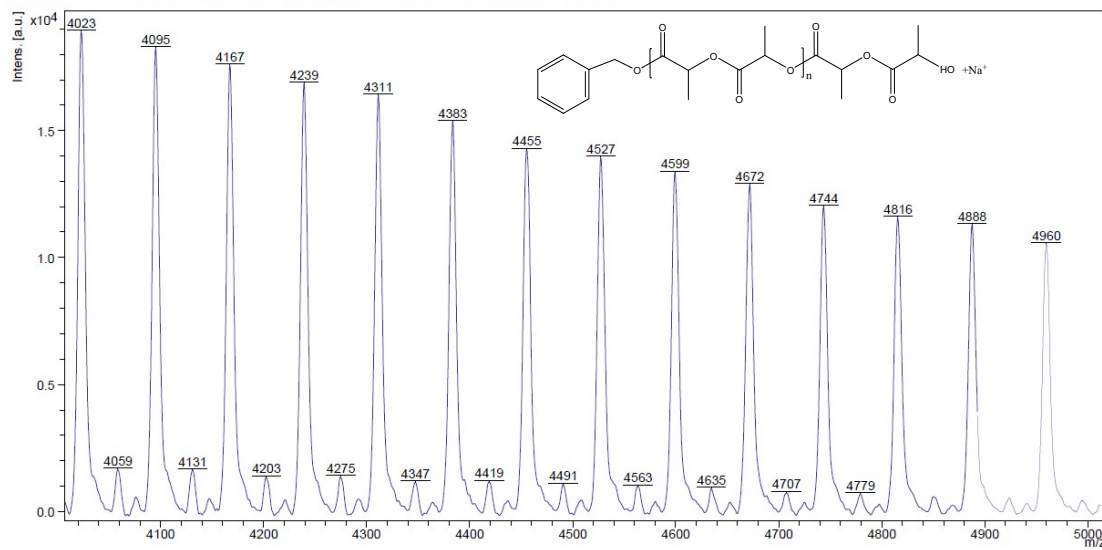

ultrafleXtreme MALDI

Date of Acquisition 2021-06-15T17:02:30.416+01:00

Printed 17/06/2021 09:35:54

National Mass Spectrometry Facility (NMSF), Swansea

D:\Data\NMSF\2021\Jun21\HULRED-FKJER-UM-A\0\_G6\1\1SLin

Comment 1 Prof. Redshaw Pb1-PLA MW=5k(poly)?? PosLin THF [1:10] (DCTB;THF) +NaOAc

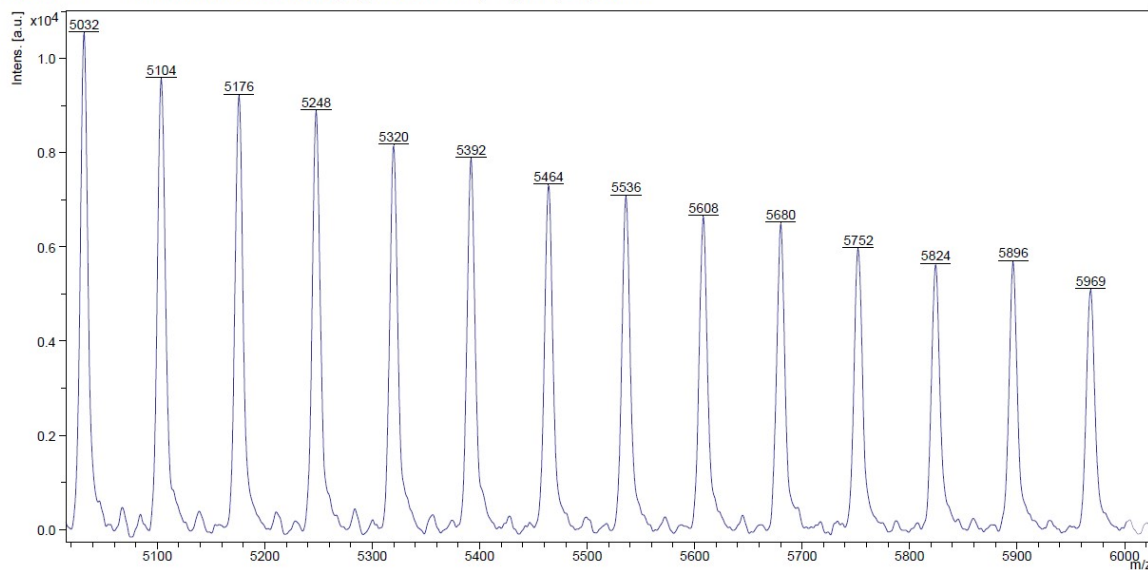

ultrafleXtreme MALDI

Date of Acquisition 2021-06-15T17:02:30.416+01:00

Printed 17/06/2021 09:36:05

National Mass Spectrometry Facility (NMSF), Swansea

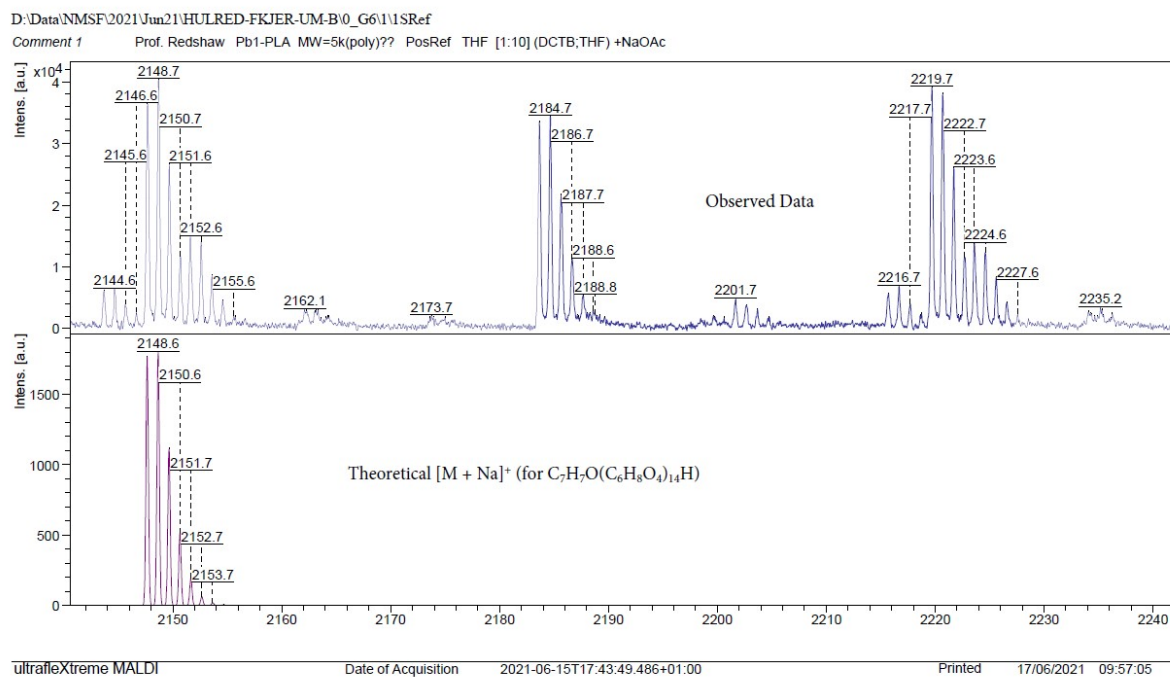

Figure S9. Mass spectrum of PLA synthesized with **2**/BnOH (run 2, Table 4).

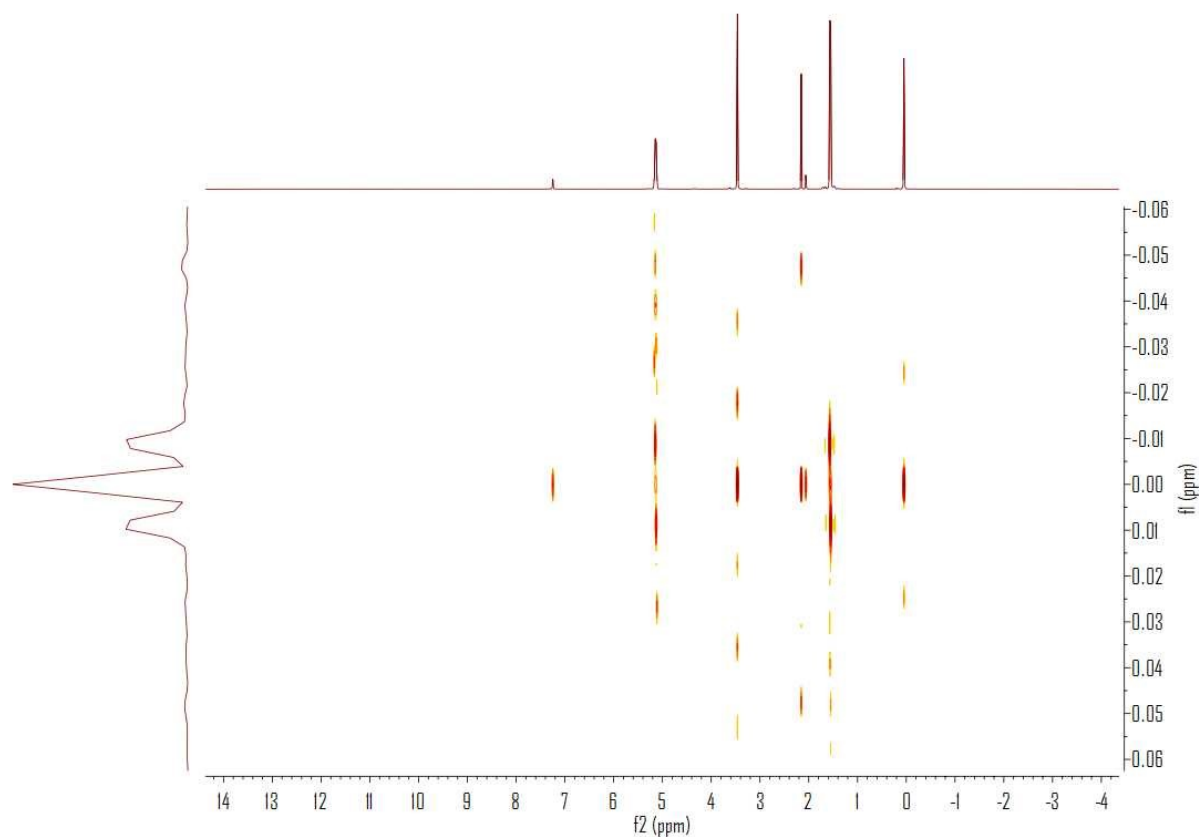

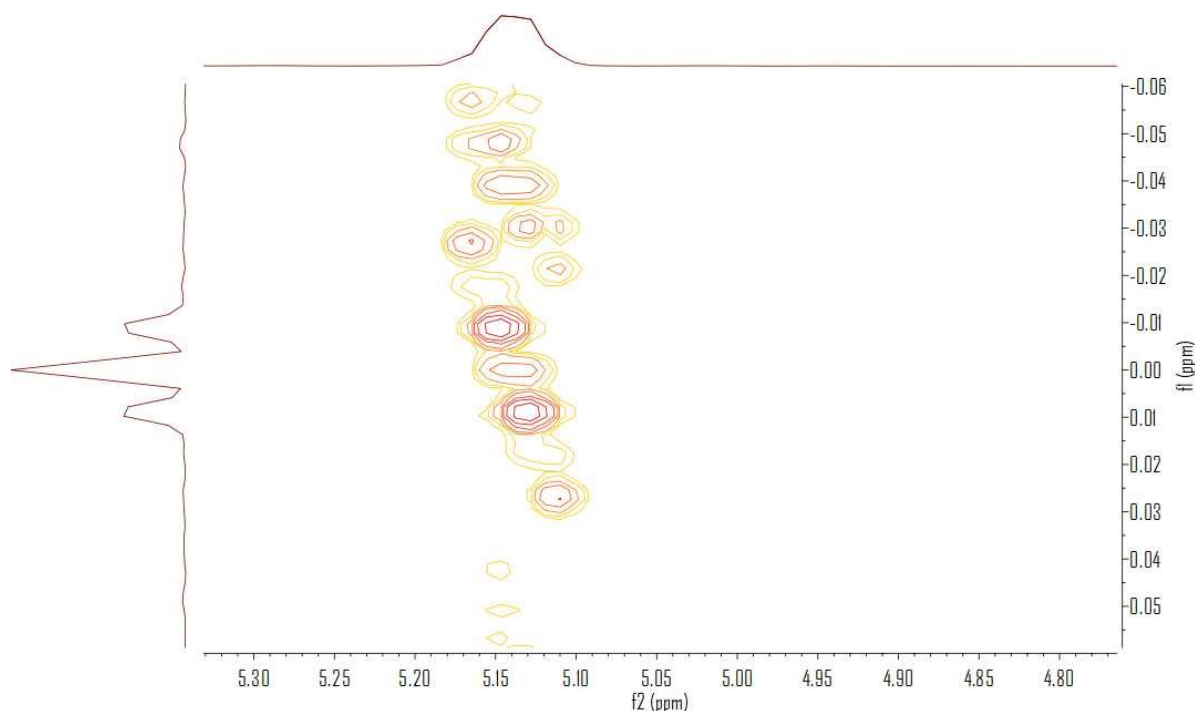

**Figure S10.** 2D J-resolved  $^1\text{H}$  NMR spectrum ( $\text{CDCl}_3$ , 400 MHz, 298 K) of the PLA synthesized with 1/BnOH (run 1, Table 4).

**Equation S1.** Determination of number-average sequence length for CL<sup>[1]</sup>

$$L_{\text{CL}} = [(I_{\text{CL-CL}}) / (I_{\text{VL-CL}})] + 1$$

Where  $I_{\text{CL-CL}}$  and  $I_{\text{VL-CL}}$  is the area of the peak belonging to the CL-CL and VL-VL dyad, respectively.

**Equation S2.** Determination of number-average sequence length for VL. <sup>[1]</sup>

$$L_{\text{VL}} = [(I_{\text{VL-VL}}) / (I_{\text{CL-VL}})] + 1$$

Where  $I_{\text{VL-VL}}$  and  $I_{\text{CL-VL}}$  is the area of the peak belonging to the VL-VL and CL-VL dyad, respectively.

**Equation S3.** Determination of the Randomness Character (R). <sup>[1]</sup>

$$R = 1 / (L_{\text{CL}}) + 1 / (L_{\text{VL}})$$

Completely block Copolymers:  $R = 0$

Copolymers with a “blocking” tendency:  $R < 1$

Completely random copolymers:  $R = 1$

Copolymers with an alternating tendency:  $R > 1$



Completely alternating copolymers:  $R = 2$

## References

- [1] (a) Q. Hu, S.-Y. Jie, P. Braunstein and B.-G. Lia, *Chinese J. Polym. Sci.* 2020, **38**, 240–247; (b) M. A. Woodruff and D. W. Hutmacher, *Prog. Polym. Sci.*, 2010, **35**, 1217–1256; (c) T. Wu, Z. Wei, Y. Ren, Y. Yu, X. Leng and Y. Li, *Polym. Degrad. Stab.*, 2018, **155**, 173–182; (d) M. T. Hunley, N. Sari, and K. L. Beers, *ACS Macro Lett.*, 2013, **2**, 375–379. (e) Z. Sun, Y. Zhao, O. Santoro, M. R. J. Elsegood, E. V. Bedwell, K. Zahra, A. Walton, and C. Redshaw, *Catal. Sci. Technol.*, 2020, **10**, 1619–1639.
